# Supplementary material for: Llgl1 prevents metaplastic survival driven by epidermal growth factor dependent migration
Source: PubMed Central journal article supplement (PMC5308616; doi:10.18632/oncotarget.11320), 2016-08-17
Supplement: oncotarget-07-60776-s001.pdf [file oncotarget-07-60776-s001.pdf]

# Llg1 prevents metaplastic survival driven by epidermal growth factor dependent migration

## Supplemental Material

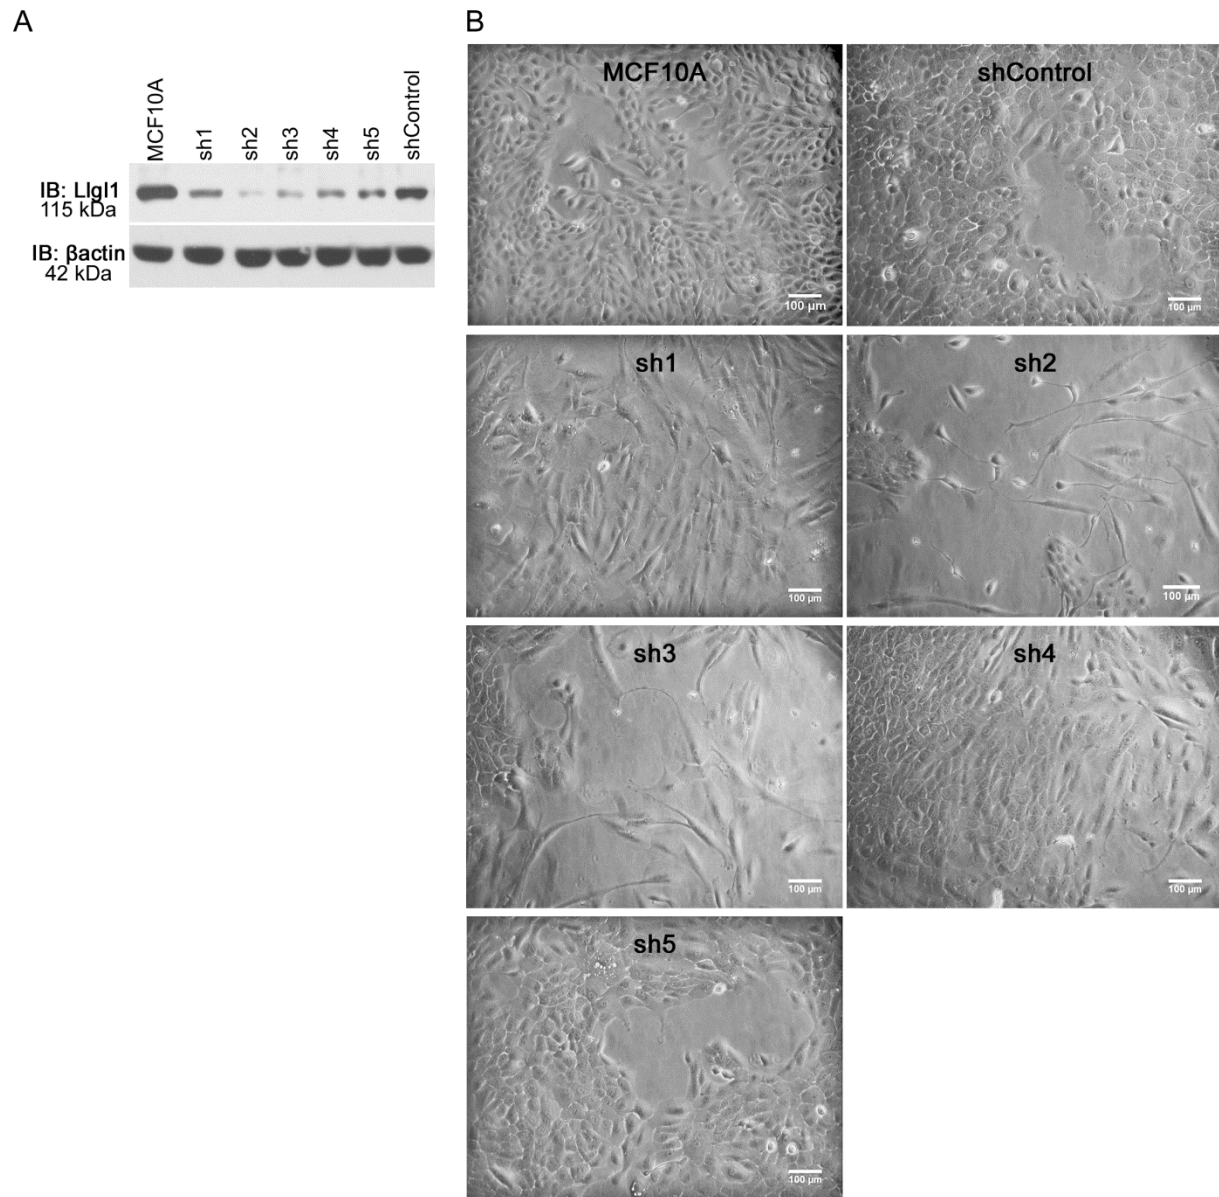

**Supplemental Figure 1. Optimization of Llg1 knockdown using multiple shRNAs targeting Llg1.** MCF10A cells were transfected with 5 different shRNAs targeting Llg1. (A) Protein

lysates were analyzed by immunoblot using antibodies: anti-Llg1 and anti- $\beta$ actin. (B) Cells were grown on plastic and observed for a mesenchymal phenotype.

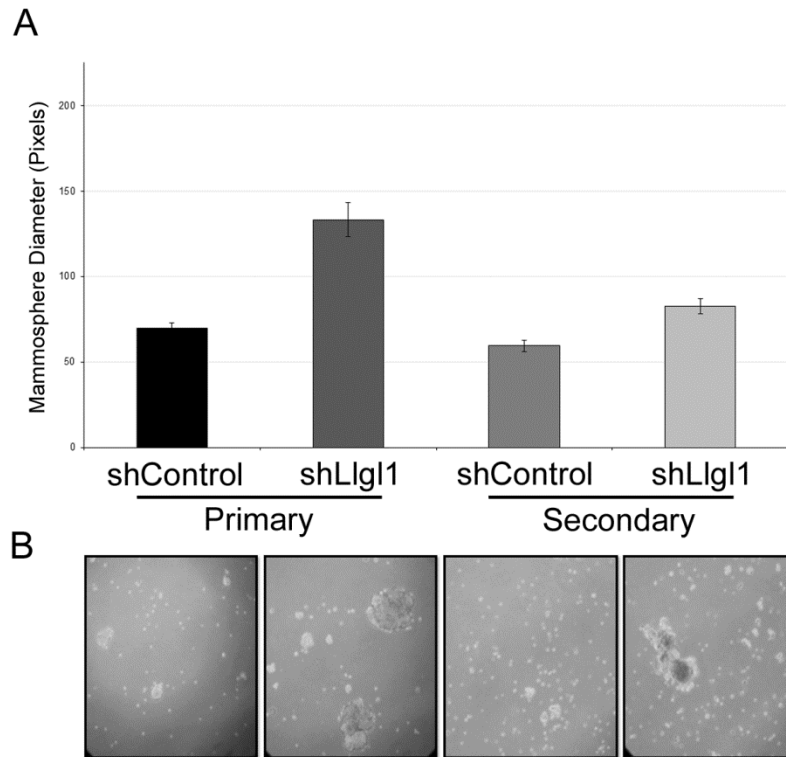

**Supplemental Figure 2. Loss of Llg1 in MCF10As increases mammosphere growth.** (A and B) MCF10A shControl and shLlg1 cells were evaluated for mammosphere growth and loss of Llg1 resulted in increased mammosphere growth and size in both primary and secondary mammospheres.

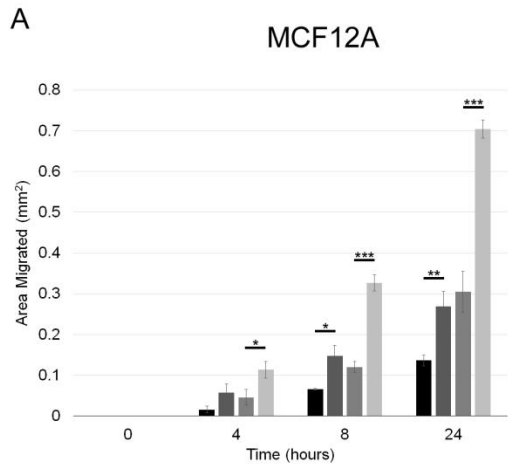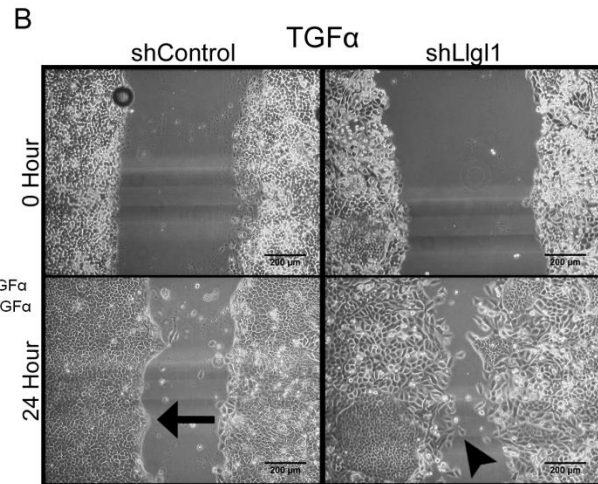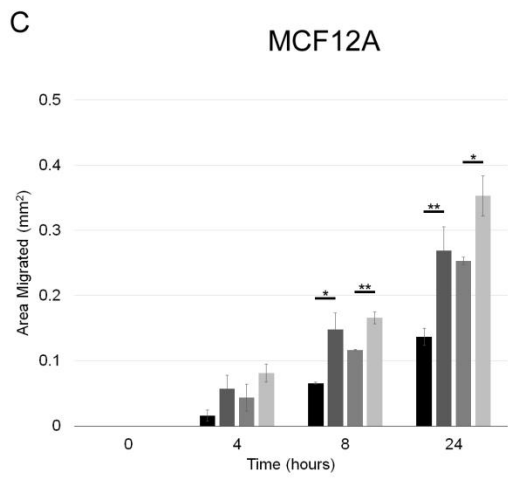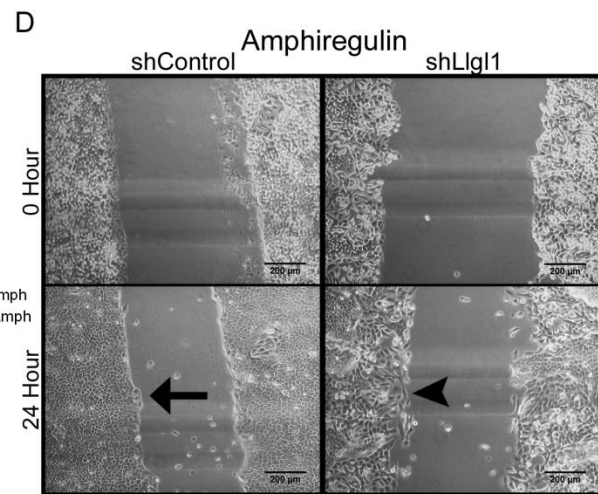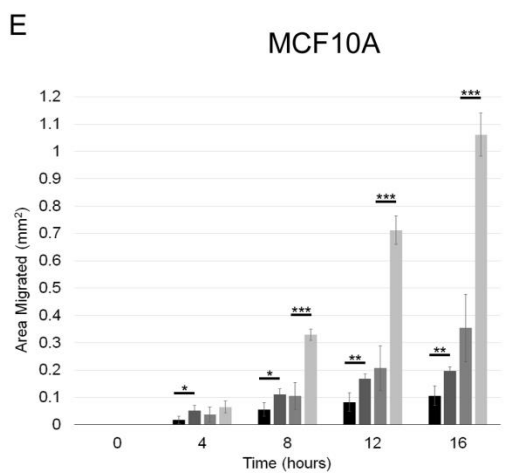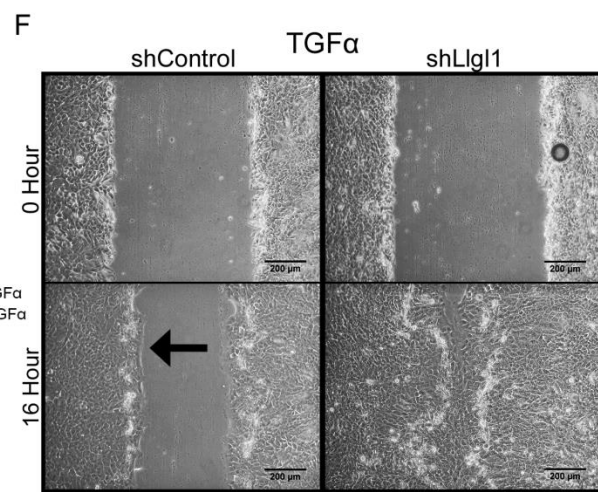

**Supplemental Figure 3. Loss of Llg1 induces migration in the presence of multiple EGFR ligands.** (A-F) MCF12A and MCF10A control and Llg1 knockdown cells were generated as described in Fig. 1, grown to confluence, scratched, and then observed for wound healing migration in serum free media with either the absence of ligand (A, C, and E) or in the presence of TGF $\alpha$  (20ng/mL) (A, B, E, and F) or the presence of Amphiregulin (20ng/mL) (C and D). Migrating epithelial sheets are indicated by arrow, disorganized cellular groups and single cells are indicated by arrowheads. Error bars show  $\pm$  standard deviation. \* P<0.05, \*\* P<0.01, \*\*\* P<0.001, \*\*\*\* P<0.0001.

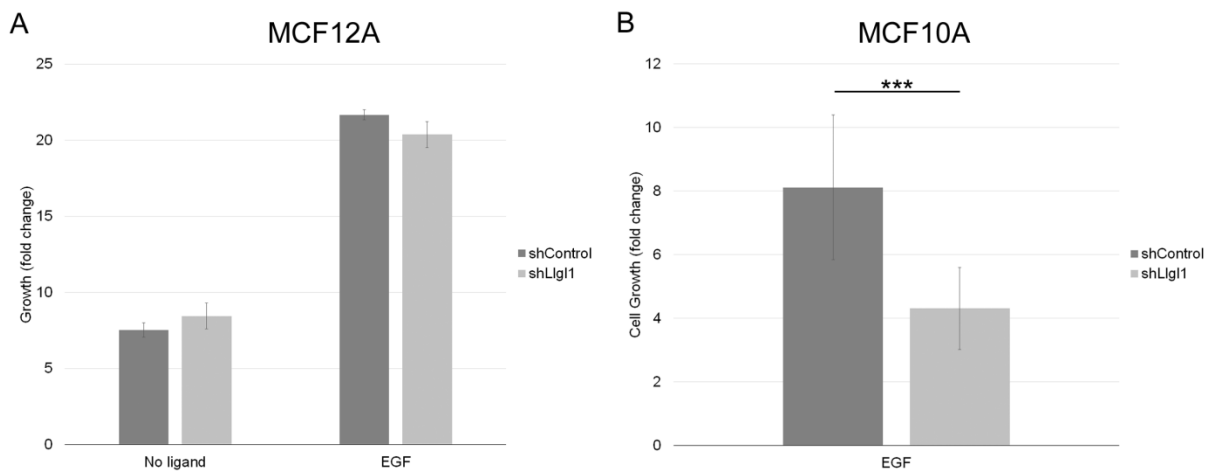

**Supplemental Figure 4. Loss of Llg1 does not increase cell growth with EGF.** (A) MCF12A shControl and shLlg1 cells were grown for 3 days and analyzed by MTT to determine cell growth in the absence or presence of EGF (20ng/mL). (B) MCF10A shControl and shLlg1 cells were grown for 3 days and analyzed by MTT to determine cell growth in the presence of EGF (20ng/mL).

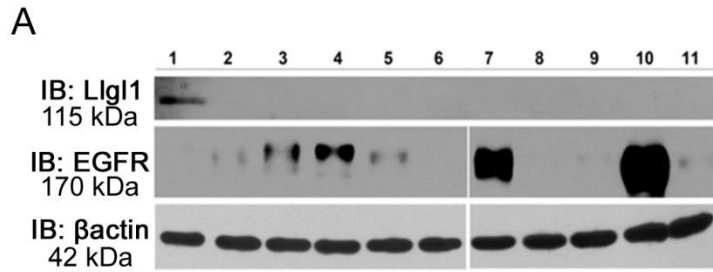

**Supplemental Figure 5. Human Breast Tumors have lost Llg1 expression and have high EGFR expression.** (A) Human PDX patient sample lysates were immunoblotted for anti-Llg1, anti-EGFR, and anti-βactin and showed that most human breast tumors have lost Llg1 expression and have high levels of EGFR expression.

**See online for Supplemental Video**

**Supplemental Video 1. MCF12A shLlg1 CD44<sub>hi</sub>/CD49f<sub>lo</sub> cells migrate randomly.** MCF12A shLlg1 CD44<sub>hi</sub>/CD49f<sub>lo</sub> cells were plated and grown to confluence under normal growth conditions, scratched, and put in serum-free media with EGF (20ng/mL). After an 8 hour incubation cells were imaged by time-lapse confocal microscopy every 10 minutes for 2.5 hours. Videos of the images were processed, displaying 2 frames/second. Migrating cells indicated by the arrowheads.
